# Supplementary material
Source: PubMed Central journal article supplement (PMC3408198)

## SUPPLEMENTAL FIGURE LEGENDS

**FIGURE S1. Comparison of growth characteristics of *FTL\_0325* mutant and WT *F. tularensis* LVS.** (A) Growth curves of *FTL\_0325* mutant (Pink lines) and *F. tularensis* LVS (Blue lines) were generated by growing bacteria in Chamberlain's medium (CDM), Mueller-Hinton broth (MHB) or Brain Heart Infusion (BHI) broth with or without 10% fetal bovine serum (FBS). Left panel: OD<sub>600</sub> were recorded at 2-hour intervals in a Biotek synergy HT plate reader (BioTek). Right panel: the bacterial numbers were quantitated by plating ten-fold dilutions on MH-chocolate agar plates and expressed as Log<sub>10</sub> CFU. (B) Disc diffusion assay to determine the sensitivity of *FTL\_0325* mutant to polymyxin B (0-200 µg/ml), SDS (0.25-2% W/V), Triton-X100 (0.25-2% V/V) and superoxide generating compound pyrogallol (0.125 mM-1M).

**FIGURE S2. *FTL\_0325* mutant of *F. tularensis* LVS does not exhibit enhanced serum sensitivity.** Mid log phase grown cultures of WT *F. tularensis* LVS and *FTL\_0325* mutants were exposed to indicated concentrations of human serum. Aliquots were collected at the indicated times, diluted 10 fold and plated on chocolate agar plates to quantitated bacterial numbers. Results are expressed as the percentage of bacteria that survived the treatment. The data are cumulative of two independent experiments.

**Table S1: Primers, plasmid vectors, and bacterial strains used and generated in the present study**

| S. No.                   | Primer                       | Sequence                                                                 | Purpose                                                                             |
|--------------------------|------------------------------|--------------------------------------------------------------------------|-------------------------------------------------------------------------------------|
| 1                        | ompA Apa1 for pcDNA 3.1 (-)  | 5'AAACGGGCCCATGAAAAA<br>TTACTGAAACTATG3'                                 | To express FTT0831c in pcDNA 3.1                                                    |
| 2                        | ompA EcoR1 for pcDNA 3.1 (-) | 5'CCGGAATTCTTACTTGTCTGTG<br>TCGTCCTTGTAGTCTAAAATAG<br>TCGTTGCCA TTGAAT3' | To express FTT0831c in pCDNA                                                        |
| 3                        | ompA upF                     | 5'ACCGCTCGAGAGCCTCTACC<br>ATACTACTCCTT3'                                 | Amplify region upstream of <i>FTT0831c</i> to make $\Delta$ <i>FTT0831c</i> .       |
| 4                        | ompA upR                     | 5'GATAATACCATTAAAACTTA<br>ATTATAC3'                                      | Amplify region upstream of <i>FTT0831c</i> to make $\Delta$ <i>FTT0831c</i> .       |
| 5                        | ompA DnF                     | 5'AGTTTTTAATGGTATTATCAAT<br>CAAGTATAAACCTAAAATAGT<br>ATTTTATATCATT3'     | Amplify region downstream of <i>FTT0831c</i> to make $\Delta$ <i>FTT0831c</i> .     |
| 6                        | ompA DnR                     | 5'AGGAGATCTCAGTCTCAACA<br>GCACGACTTAC3'                                  | Amplify region downstream of <i>FTT0831c</i> to make $\Delta$ <i>FTT0831c</i> .     |
| 7                        | Pkk214 F                     | 5, GTA ACT GCA GAT GAA AAA<br>ATT ACT TGA AAC TAT GCT3'                  | Amplification of <i>FTT0831c</i> for cloning in transcomplementation vector pKK214. |
| 8                        | Pkk214R                      | TTA TAA AAT AGT CGT TGC<br>CAT TGA AT                                    | Amplification of <i>FTT0831c</i> for cloning in. transcomplementation vector pKK214 |
| <b>Plasmid Vectors</b>   |                              |                                                                          |                                                                                     |
|                          | pDMK                         |                                                                          | (26)                                                                                |
|                          | pKK214::GFP                  |                                                                          | Albany Med. Microbiology core                                                       |
|                          | pcDNA 3.1                    |                                                                          | Invitrogen                                                                          |
| <b>Bacterial Strains</b> |                              |                                                                          |                                                                                     |

***E. coli* strains**

S17-1 (pDMK:: $\Delta$ *FTT0831c*)

DH<sub>5</sub> $\alpha$  (pKK214::*FTT0831c*)

DH<sub>5</sub> $\alpha$  (pcDNA::*FTT0831c*)

This study

This study

This study

***Francisella* strains**

*FTL\_0325* mutant

$\Delta$ *FTT0831c* mutant

$\Delta$ *FTT0831c*+p*FTT0831c*

This study

This study

This study

Figure S1

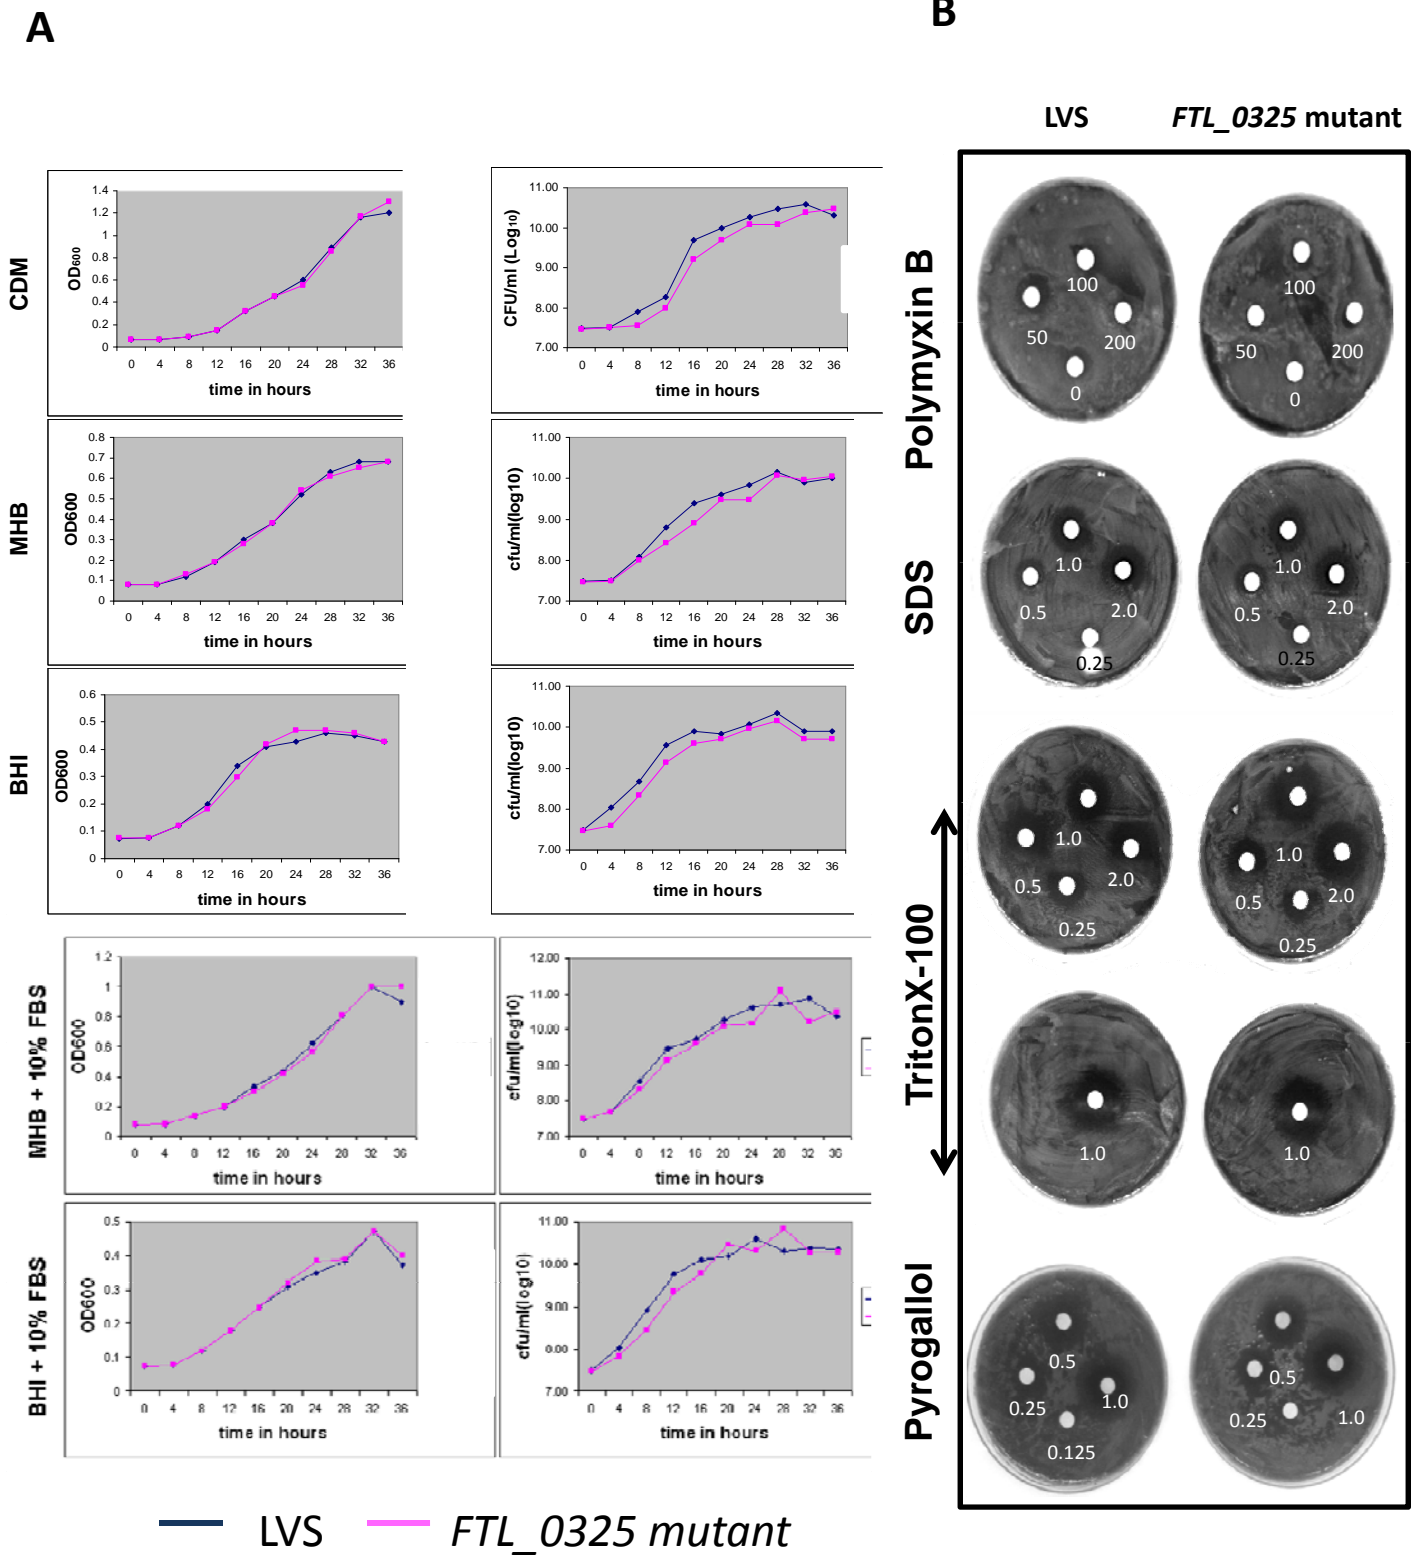

Figure S2

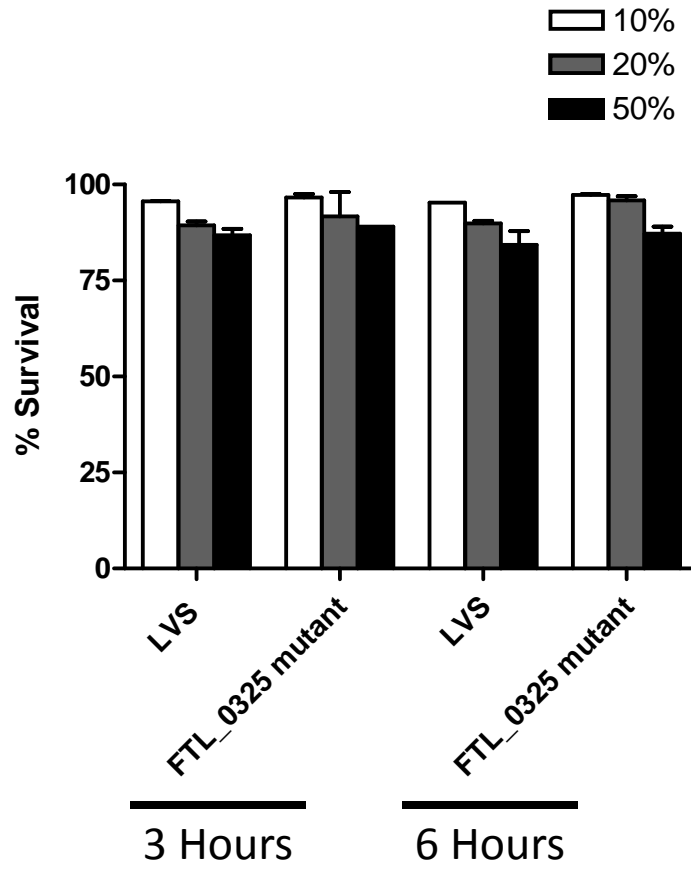

Supplement: supp_M112.367672_Supplemental_Information.pdf [file supp_M112.367672_Supplemental_Information.pdf]
